# Supplementary material for: Exploring the influence of (n − 1)d subvalence correlation and of spin–orbit coupling on chalcogen bonding
Source: Royal Society of Chemistry journal article supplement (doi:10.1039/d4cp01877j), 2024-07-31
Supplement: d4cp01877j1.zip [file d4cp01877j1.zip]

## Sheet: Table 4
																								0.0813265	0.076939	0.0978836			0.0422936
																	DF-CCSD/{T,Q}Z	BE (kcal/mol)						cPNO-LCCSD(T)	BE (kcal/mol)
										DF-CCSD/{T,Q}Z	cPNO-LCCSD(T)					Molecule	HF	DF-MP2	DF-CCSD	CCSD-MP2	Tot		Molecule	HF	PNO-LMP2	PNO-LCCSD	(T)	PNO-LCCSD(T)	CCSD-MP2	CCSD(T)-MP2	Tot
					NDF2	CSPI	DEBC	Hobza ratio	%HF	BE (kcal/mol)	BE (kcal/mol)					HAL-CHAL-1_0.90	18.801	4.23859	4.41976	0.181172	23.2208		CHAL-CHAL-1_0.90	18.9275	4.26391	4.56686	-2.34918	2.21767	0.302946	-2.04624	21.1452
				TeO3…TeHF												CHAL-CHAL-1_0.95	26.3222	4.27875	4.20052	-0.0782254	30.5228		CHAL-CHAL-1_0.95	26.4278	4.35021	4.34766	-1.40938	2.93829	-0.00254319	-1.41192	29.3661
				0.90r$_\text{e}$	-402.048	-88.3977	0.999936	0.380938	100.508	23.2208	21.1452					CHAL-CHAL-1_1.0	27.0424	4.73096	4.23573	-0.495232	31.2782		CHAL-CHAL-1_1.0	27.1353	4.81428	4.37243	-0.572207	3.80022	-0.441852	-1.01406	30.9356																Molecule	PNO-LCCSD(T)
				0.95r$_\text{e}$	34.8051	8.42403	0.993028	0.389463	96.5475	30.5228	29.3661					CHAL-CHAL-1_1.05	24.3365	5.07724	4.18896	-0.888275	28.5254		CHAL-CHAL-1_1.05	24.42	5.14521	4.28455	0.0796701	4.36422	-0.86066	-0.78099	28.7843																CHAL-CHAL-1_0.90	2.26314
				1.0r$_\text{e}$	11.8006	3.14577	0.953007	0.401696	92.5921	31.2782	30.9356					CHAL-CHAL-1_1.10	20.3931	5.04113	3.89146	-1.14966	24.2845		CHAL-CHAL-1_1.10	20.468	5.08199	3.94878	0.431367	4.38015	-1.13321	-0.70184	24.8481																CHAL-CHAL-1_0.95	2.9705
				1.05r$_\text{e}$	6.23763	1.83725	0.878324	0.417579	88.7385	28.5254	28.7843					CHAL-CHAL-1_1.25	10.4433	3.39791	2.25737	-1.14053	12.7007		CHAL-CHAL-1_1.25	10.4872	3.33378	2.16069	0.307205	2.4679	-1.17308	-0.86588	12.9551																CHAL-CHAL-1_1.0	3.84494
				1.10r$_\text{e}$	4.15082	1.35501	0.804609	0.437004	85.406	24.2845	24.8481					CHAL-CHAL-1_1.50	4.25165	1.3075	0.885698	-0.421803	5.13735		CHAL-CHAL-1_1.50	4.25866	1.26699	0.886487	0.133584	1.02007	-0.380506	-0.246921	5.27873																CHAL-CHAL-1_1.05	4.41692
				1.25r$_\text{e}$	2.58078	1.09843	0.739461	0.512973	80.0467	12.7007	12.9551					CHAL-CHAL-1_2.0	1.18933	0.135575	0.0922787	-0.0432967	1.28161		CHAL-CHAL-1_2.0	1.18884	0.126471	0.121412	0.0151662	0.136579	-0.00505871	0.0101075	1.32542																CHAL-CHAL-1_1.10	4.43016
				1.50r$_\text{e}$	2.20999	1.03699	0.719829	0.644908	80.8574	5.13735	5.27873					CHAL-CHAL-30_0.90	1.49579	8.72006	7.34849	-1.37158	8.84428		CHAL-CHAL-30_0.90	1.53489	8.83424	7.4822	0.495581	7.97778	-1.35205	-0.856464	9.51267																CHAL-CHAL-1_1.25	2.48839
				2.0r$_\text{e}$	4.44237	1.90992	0.885914	0.571925	93.1573	1.28161	1.32542					CHAL-CHAL-30_0.95	5.5021	8.00019	6.57318	-1.42701	12.0753		CHAL-CHAL-30_0.95	5.53291	8.10839	6.68219	0.802516	7.4847	-1.4262	-0.623685	13.0176																CHAL-CHAL-1_1.50	1.03801
				SeO3…SeHF												CHAL-CHAL-30_1.0	6.85984	7.2355	5.75775	-1.47775	12.6176		CHAL-CHAL-30_1.0	6.88681	7.32401	5.83932	0.907518	6.74684	-1.48469	-0.577168	13.6336																CHAL-CHAL-1_2.0	0.142377
				0.90r$_\text{e}$	4.3083	1.09477	0.738341	0.271005	21.5088	8.84428	9.51267					CHAL-CHAL-30_1.05	6.95313	6.40696	4.93348	-1.47349	11.8866		CHAL-CHAL-30_1.05	6.97807	6.46548	4.98603	0.881526	5.86756	-1.47945	-0.597924	12.8456																CHAL-CHAL-30_0.90	8.02856
				0.95r$_\text{e}$	3.3227	0.946155	0.68728	0.299356	50.9044	12.0753	13.0176					CHAL-CHAL-30_1.10	6.50827	5.56208	4.16205	-1.40003	10.6703		CHAL-CHAL-30_1.10	6.53116	5.5694	4.08958	0.735712	4.82529	-1.47982	-0.74411	11.3564																CHAL-CHAL-30_0.95	7.50366
				1.0r$_\text{e}$	2.61699	0.832872	0.639975	0.331057	57.7246	12.6176	13.6336					CHAL-CHAL-30_1.25	4.60824	3.37136	2.42493	-0.946423	7.03317		CHAL-CHAL-30_1.25	4.6216	3.34055	2.38728	0.483396	2.87067	-0.953275	-0.469879	7.49228																CHAL-CHAL-30_1.0	6.75371
				1.05r$_\text{e}$	2.1322	0.753577	0.601827	0.366237	60.1496	11.8866	12.8456					CHAL-CHAL-30_1.50	2.35795	1.32135	0.96348	-0.357868	3.32143		CHAL-CHAL-30_1.50	2.35888	1.30786	0.989206	0.228594	1.2178	-0.318656	-0.0900617	3.57668																CHAL-CHAL-30_1.05	5.87815
				1.10r$_\text{e}$	1.79764	0.697761	0.572229	0.404867	61.3157	10.6703	11.3564					CHAL-CHAL-30_2.0	0.57274	0.217012	0.153858	-0.0631543	0.726598		CHAL-CHAL-30_2.0	0.572656	0.206968	0.16697	0.0362643	0.203234	-0.0399979	-0.00373361	0.775891																CHAL-CHAL-30_1.10	4.84262
				1.25r$_\text{e}$	1.2632	0.587975	0.506853	0.53812	63.896	7.03317	7.49228					CHAL-CHAL-45_0.90	0.0173171	10.9373	7.87981	-3.05751	7.89713		CHAL-CHAL-45_0.90	-0.14992	11.1092	8.09782	1.38057	9.4784	-3.01136	-1.63078	9.32848																CHAL-CHAL-30_1.25	2.86813
				1.50r$_\text{e}$	0.993074	0.476451	0.430126	0.743138	69.8493	3.32143	3.57668					CHAL-CHAL-45_0.95	2.49694	9.83666	6.93439	-2.90227	9.43133		CHAL-CHAL-45_0.95	2.32173	9.99047	7.10512	1.32911	8.43423	-2.88535	-1.55624	10.756																CHAL-CHAL-30_1.50	1.22083
				2.0r$_\text{e}$	1.02646	0.462446	0.419737	0.717255	78.8549	0.726598	0.775891					CHAL-CHAL-45_1.0	3.73388	8.71443	6.02767	-2.68676	9.76155		CHAL-CHAL-45_1.0	3.57717	8.83698	6.15411	1.23345	7.38755	-2.68287	-1.44943	10.9647																CHAL-CHAL-30_2.0	0.204799
				SO3…SHF												CHAL-CHAL-45_1.05	4.2814	7.58023	5.17416	-2.40607	9.45556		CHAL-CHAL-45_1.05	4.1667	7.66729	5.24855	1.11268	6.36123	-2.41874	-1.30605	10.5279																CHAL-CHAL-45_0.90	9.5195
				0.90r$_\text{e}$	1.6471	0.437157	0.400555	0.28629	-5.55577	7.89713	9.32848					CHAL-CHAL-45_1.10	4.43003	6.47924	4.3914	-2.08785	8.82143		CHAL-CHAL-45_1.10	4.36716	6.53494	4.40442	0.973699	5.37812	-2.13052	-1.15682	9.74528																CHAL-CHAL-45_0.95	8.47007
				0.95r$_\text{e}$	1.26669	0.391934	0.364907	0.312012	20.5556	9.43133	10.756					CHAL-CHAL-45_1.25	3.83067	3.74484	2.54484	-1.2	6.37551		CHAL-CHAL-45_1.25	3.84738	3.77636	2.55194	0.604804	3.15674	-1.22442	-0.619614	7.00413																CHAL-CHAL-45_1.0	7.4207
				1.0r$_\text{e}$	0.988436	0.355902	0.3353	0.340827	31.9543	9.76155	10.9647					CHAL-CHAL-45_1.50	2.21814	1.34934	0.930472	-0.41887	3.14861		CHAL-CHAL-45_1.50	2.16293	1.3522	0.946191	0.240311	1.1865	-0.406005	-0.165694	3.34943																CHAL-CHAL-45_1.05	6.37713
				1.05r$_\text{e}$	0.791403	0.328837	0.312381	0.372605	38.8045	9.45556	10.5279					CHAL-CHAL-45_2.0	0.532779	0.209644	0.136213	-0.0734311	0.668992		CHAL-CHAL-45_2.0	0.546149	0.200892	0.139066	0.0349724	0.174038	-0.0618259	-0.0268535	0.720187																CHAL-CHAL-45_1.10	5.38555
				1.10r$_\text{e}$	0.653741	0.308537	0.294823	0.406953	43.787	8.82143	9.74528																																				CHAL-CHAL-45_1.25	3.15967
				1.25r$_\text{e}$	0.44878	0.270727	0.26132	0.51751	54.2972	6.37551	7.00413																																				CHAL-CHAL-45_1.50	1.19374
				1.50r$_\text{e}$	0.400776	0.2545	0.246638	0.656517	65.3431	3.14861	3.34943																																				CHAL-CHAL-45_2.0	0.177464
				2.0r$_\text{e}$	0.516459	0.319879	0.304671	0.602844	75.9819	0.668992	0.720187

## Sheet: SAPT results
	CHAL-CHAL_1=TeO3…TeHF
	CHAL-CHAL_30=SeO3…SeHF
	CHAL-CHAL-_45=SO3…SHF
					IE_HF	IE_SS	IE_OS	TOT (SAPT)	ELEC	EXCHANGE	INDUCTION	SAPT0-disp	Disp20	Exch-Disp20					NDF2	CSPI	DEBC	Hobza ratio	%HF
Te		CHAL-CHAL-1_0.80	0.8		27.4274	-6.76061	6.82405	-46.1277	-200.513	471.799	-242.051	-75.3625	-84.2531	8.89067	4.34691	1.63378	CHAL-CHAL-1_0.80	0.80re	-1189.03	-214.151	0.999989		99.7693
		CHAL-CHAL-1_0.85	0.85		-6.70533	-5.71413	6.37223	-58.4388	-159.403	360.106	-199.165	-59.9764	-69.0706	9.09422	2.72769	1.02631	CHAL-CHAL-1_0.85	0.85re	-92.1351	-18.3654	0.998521		110.883
		CHAL-CHAL-1_0.90	0.9		-23.4379	-5.17647	5.29493	-60.0555	-124.711	271.97	-159.807	-47.5073	-56.2815	8.77419	2.0766	0.791057	CHAL-CHAL-1_0.90	0.90re	-402.048	-88.3977	0.999936	0.380938	100.508
		CHAL-CHAL-1_0.95	0.95		-29.328	-4.94177	3.89301	-55.5271	-96.4172	203.387	-124.946	-37.5509	-45.605	8.05414	1.7364	0.676263	CHAL-CHAL-1_0.95	0.95re	34.8051	8.42403	0.993028	0.389463	96.5475
		CHAL-CHAL-1_1.0	1		-28.9803	-4.80618	2.48758	-48.0017	-73.8849	150.71	-95.1476	-29.6793	-36.7707	7.09145	1.53921	0.618297	CHAL-CHAL-1_1.0	1.0re	11.8006	3.14577	0.953007	0.401696	92.5921
		CHAL-CHAL-1_1.05	1.05		-25.575	-4.60435	1.3587	-39.6205	-56.2548	110.737	-70.612	-23.4908	-29.5214	6.03062	1.41984	0.592895	CHAL-CHAL-1_1.05	1.05re	6.23763	1.83725	0.878324	0.417579	88.7385
		CHAL-CHAL-1_1.10	1.1		-21.1737	-4.26035	0.64223	-31.7216	-42.6456	80.7419	-51.1817	-18.6363	-23.6178	4.98158	1.34437	0.587496	CHAL-CHAL-1_1.10	1.10re	4.15082	1.35501	0.804609	0.437004	85.406
		CHAL-CHAL-1_1.25	1.25		-10.604	-2.77333	0.130083	-15.4559	-18.4511	30.0554	-17.5954	-9.4649	-11.9235	2.45864	1.19379	0.612381	CHAL-CHAL-1_1.25	1.25re	2.58078	1.09843	0.739461	0.512973	80.0467
		CHAL-CHAL-1_1.50	1.5		-4.23607	-1.02142	0.018549	-5.69336	-4.99174	5.20939	-2.69179	-3.21921	-3.78425	0.565036	0.876765	0.565432	CHAL-CHAL-1_1.50	1.50re	2.20999	1.03699	0.719829	0.644908	80.8574
		CHAL-CHAL-1_2.0	2		-1.18962	-0.127136	0.0397549	-1.28778	-0.831509	0.122036	-0.102748	-0.475561	-0.492406	0.0168452	0.645692	0.369287	CHAL-CHAL-1_2.0	2.0re	4.44237	1.90992	0.885914	0.571925	93.1573
Se		CHAL-CHAL-30_0.80	0.8		26.8181	-7.40776	1.0366	-43.8978	-215.551	397.775	-178.039	-48.082	-60.9571	12.8751			CHAL-CHAL-30_0.80	0.80re	6.54683	1.3254	0.798278		131.16
		CHAL-CHAL-30_0.85	0.85		7.8594	-6.55367	0.724139	-38.3883	-154.388	287.475	-133.54	-37.9349	-48.5768	10.6419			CHAL-CHAL-30_0.85	0.85re	5.50737	1.24844	0.780488		387.187
		CHAL-CHAL-30_0.90	0.9		-1.54406	-5.90165	0.26699	-32.4972	-110.369	206.373	-98.591	-29.9105	-38.5624	8.65194			CHAL-CHAL-30_0.90	0.90re	4.3083	1.09477	0.738341	0.271005	21.5088
		CHAL-CHAL-30_0.95	0.95		-5.66326	-5.31498	-0.147051	-26.9912	-78.8714	147.198	-71.7069	-23.6107	-30.5233	6.91265			CHAL-CHAL-30_0.95	0.95re	3.3227	0.946155	0.68728	0.299356	50.9044
		CHAL-CHAL-30_1.0	1		-7.0521	-4.73312	-0.431583	-22.2173	-56.4274	104.357	-51.4663	-18.6807	-24.112	5.43128			CHAL-CHAL-30_1.0	1.0re	2.61699	0.832872	0.639975	0.331057	57.7246
		CHAL-CHAL-30_1.05	1.05		-7.14292	-4.14925	-0.583077	-18.2568	-40.4726	73.5739	-36.5355	-14.8226	-19.0247	4.20218			CHAL-CHAL-30_1.05	1.05re	2.1322	0.753577	0.601827	0.366237	60.1496
		CHAL-CHAL-30_1.10	1.1		-6.68328	-3.57931	-0.637198	-15.0387	-29.1363	51.6164	-25.7224	-11.7963	-15.0028	3.20642			CHAL-CHAL-30_1.10	1.10re	1.79764	0.697761	0.572229	0.404867	61.3157
		CHAL-CHAL-30_1.25	1.25		-4.72204	-2.11848	-0.549674	-8.6442	-11.2216	17.3817	-8.76565	-6.03858	-7.36683	1.32825			CHAL-CHAL-30_1.25	1.25re	1.2632	0.587975	0.506853	0.53812	63.896
		CHAL-CHAL-30_1.50	1.5		-2.39278	-0.762478	-0.270374	-3.63307	-2.77007	2.6703	-1.47475	-2.05855	-2.31376	0.255213			CHAL-CHAL-30_1.50	1.50re	0.993074	0.476451	0.430126	0.743138	69.8493
		CHAL-CHAL-30_2.0	2		-0.581044	-0.11393	-0.0418776	-0.74291	-0.440205	0.0558464	-0.0428125	-0.315739	-0.321999	0.00626027			CHAL-CHAL-30_2.0	2.0re	1.02646	0.462446	0.419737	0.717255	78.8549
S		CHAL-CHAL-45_0.80	0.8		14.7122	-7.87387	-2.48201	-31.1673	-155.816	301.389	-138.782	-37.9582	-48.0733	10.1152			CHAL-CHAL-45_0.80	0.80re	2.66537	0.520656	0.461811		337.72
		CHAL-CHAL-45_0.85	0.85		5.34607	-7.04785	-2.44055	-26.5832	-112.717	216.436	-100.593	-29.7094	-38.2204	8.51093			CHAL-CHAL-45_0.85	0.85re	2.13113	0.485573	0.436801		-129.06
		CHAL-CHAL-45_0.90	0.9		0.462811	-6.31853	-2.47456	-22.2453	-81.3029	154.344	-72.0107	-23.2762	-30.2472	6.97099			CHAL-CHAL-45_0.90	0.90re	1.6471	0.437157	0.400555	0.28629	-5.55577
		CHAL-CHAL-45_0.95	0.95		-2.0872	-5.61419	-2.45256	-18.6126	-58.6028	109.362	-51.0873	-18.2848	-23.8568	5.57203			CHAL-CHAL-45_0.95	0.95re	1.26669	0.391934	0.364907	0.312012	20.5556
		CHAL-CHAL-45_1.0	1		-3.4044	-4.91485	-2.33471	-15.6963	-42.2951	77.0426	-36.0284	-14.4153	-18.7742	4.35889			CHAL-CHAL-45_1.0	1.0re	0.988436	0.355902	0.3353	0.340827	31.9543
		CHAL-CHAL-45_1.05	1.05		-4.03865	-4.2317	-2.13733	-13.3603	-30.6209	53.9916	-25.3214	-11.4095	-14.756	3.34653			CHAL-CHAL-45_1.05	1.05re	0.791403	0.328837	0.312381	0.372605	38.8045
		CHAL-CHAL-45_1.10	1.1		-4.27012	-3.58665	-1.89527	-11.4536	-22.277	37.6594	-17.7704	-9.06567	-11.5937	2.52803			CHAL-CHAL-45_1.10	1.10re	0.653741	0.308537	0.294823	0.406953	43.787
		CHAL-CHAL-45_1.25	1.25		-3.80777	-2.03637	-1.16868	-7.30143	-8.97262	12.4914	-6.17676	-4.64342	-5.65319	1.00977			CHAL-CHAL-45_1.25	1.25re	0.44878	0.270727	0.26132	0.51751	54.2972
		CHAL-CHAL-45_1.50	1.5		-2.17475	-0.723503	-0.42995	-3.3293	-2.46106	1.88093	-1.13343	-1.61573	-1.80044	0.184712			CHAL-CHAL-45_1.50	1.50re	0.400776	0.2545	0.246638	0.656517	65.3431
		CHAL-CHAL-45_2.0	2		-0.539035	-0.112447	-0.0579431	-0.707267	-0.428619	0.0384529	-0.0587101	-0.25839	-0.262878	0.0044879			CHAL-CHAL-45_2.0	2.0re	0.516459	0.319879	0.304671	0.602844	75.9819

## Sheet: Table S1
			Table S1: RMS Deviations (kcal/mol) for different components of total interaction energies computed across different basis sets utilizing localized and canonical approaches. The statistics pertain to `valence + subvalence(n$-$1)d` electron correlation.
				Raw				Half-CP				CP
			subvalenceD_aWCVTZ	Te	Se	S	All	Te	Se	S	All	Te	Se	S	All
		Tight	HF	0.28	0.224	1.082	0.658	0.42	0.065	0.533	0.393	0.565	0.233	0.55	0.475
			PNO-LMP2	1.729	1.015	0.685	1.223	2.543	1.565	1.142	1.846	3.363	2.122	1.607	2.476
			PNO-LCCSD	1.852	1.051	0.757	1.305	2.547	1.53	1.158	1.841	3.245	2.015	1.565	2.383
			PNO-LCCSD(T)	1.985	1.151	0.843	1.411	2.761	1.686	1.285	2.01	3.541	2.225	1.732	2.614
			(T)	0.137	0.104	0.089	0.112	0.219	0.159	0.129	0.173	0.3	0.213	0.169	0.234
			CCSD(T)-MP2	0.267	0.14	0.164	0.198	0.228	0.123	0.145	0.172	0.19	0.107	0.127	0.146
			CCSD-MP2	0.13	0.039	0.076	0.09	0.031	0.038	0.02	0.031	0.122	0.109	0.044	0.097
			subvalenceD_aWCVQZ
			HF	0.017	0.052	0.133	0.083	0.046	0.015	0.123	0.076	0.079	0.024	0.114	0.081
			PNO-LMP2	0.804	0.506	0.37	0.589	1.223	0.78	0.599	0.906	1.644	1.056	0.829	1.226
			PNO-LCCSD	0.801	0.465	0.406	0.584	1.094	0.659	0.553	0.804	1.389	0.855	0.701	1.025
			PNO-LCCSD(T)	0.876	0.521	0.451	0.643	1.197	0.732	0.61	0.883	1.519	0.945	0.77	1.124
			(T)	0.077	0.058	0.046	0.061	0.104	0.074	0.057	0.081	0.132	0.091	0.069	0.101
			CCSD(T)-MP2	0.087	0.02	0.084	0.071	0.05	0.049	0.017	0.042	0.132	0.112	0.061	0.106
			CCSD-MP2	0.031	0.042	0.039	0.038	0.131	0.122	0.046	0.107	0.256	0.203	0.129	0.203
			subvalenceD_aWCVTQZ
			HF	0.097	0.025	0.632	0.369	0.111	0.03	0.372	0.225	0.125	0.064	0.228	0.155
			PNO-LMP2	0.05	0.042	0.091	0.065	0.037	0.063	0.103	0.073	0.083	0.085	0.118	0.097
			PNO-LCCSD	0.067	0.058	0.165	0.108	0.078	0.054	0.131	0.093	0.091	0.051	0.098	0.082
			PNO-LCCSD(T)	0.099	0.079	0.18	0.127	0.099	0.065	0.136	0.104	0.099	0.054	0.094	0.085
			(T)	0.033	0.024	0.016	0.025	0.021	0.013	0.007	0.015	0.01	0.003	0.004	0.006
			CCSD(T)-MP2	0.144	0.039	0.091	0.101	0.089	0.016	0.035	0.056	0.042	0.041	0.03	0.038
			CCSD-MP2	0.112	0.021	0.078	0.08	0.07	0.021	0.031	0.046	0.037	0.042	0.027	0.036
			subvalenceD_aWCV5Z
			HF	0.012	0.011	0.049	0.03	0.016	0.005	0.043	0.026	0.02	0.002	0.036	0.024
			PNO-LMP2	0.45	0.282	0.191	0.326	0.669	0.427	0.328	0.496	0.889	0.572	0.465	0.667
			PNO-LCCSD	0.413	0.242	0.195	0.299	0.527	0.317	0.267	0.387	0.642	0.393	0.338	0.476
			PNO-LCCSD(T)	0.453	0.271	0.216	0.329	0.573	0.35	0.292	0.423	0.694	0.43	0.368	0.517
			(T)	0.04	0.029	0.021	0.031	0.047	0.033	0.026	0.036	0.053	0.037	0.03	0.041
			CCSD(T)-MP2	0.026	0.014	0.029	0.024	0.098	0.077	0.036	0.075	0.196	0.142	0.097	0.151
			CCSD-MP2	0.041	0.04	0.011	0.034	0.142	0.109	0.061	0.109	0.247	0.179	0.127	0.191		Table 1
			subvalenceD_aWCVQ5Z															All	Te	Se	S	All	Te	Se	S	All	Te	Se	S
			HF	0.012	0.01	0.006	0.01	REF				0.012	0.01	0.006	0.01		HF	0.012	0.01	0.006	0.01	REF				0.012	0.01	0.006	0.01
			PNO-LMP2	0.027	0.018	0.026	0.024					0.027	0.018	0.026	0.024		PNO-LMP2	0.027	0.018	0.026	0.024					0.027	0.018	0.026	0.024
			PNO-LCCSD	0.055	0.038	0.006	0.039					0.055	0.038	0.006	0.039		PNO-LCCSD	0.055	0.038	0.006	0.039					0.055	0.038	0.006	0.039
			PNO-LCCSD(T)	0.065	0.044	0.007	0.046					0.065	0.044	0.007	0.046		PNO-LCCSD(T)	0.065	0.044	0.007	0.046					0.065	0.044	0.007	0.046
			(T)	0.011	0.007	0.002	0.007					0.011	0.007	0.002	0.007		(T)	0.011	0.007	0.002	0.007					0.011	0.007	0.002	0.007
			CCSD(T)-MP2	0.04	0.029	0.026	0.032					0.04	0.029	0.026	0.032		CCSD(T)-MP2	0.04	0.029	0.026	0.032					0.04	0.029	0.026	0.032
			CCSD-MP2	0.029	0.023	0.025	0.026					0.029	0.023	0.025	0.026		CCSD-MP2	0.029	0.023	0.025	0.026					0.029	0.023	0.025	0.026
																	HF	0.017	0.052	0.133	0.083	0.046	0.015	0.123	0.076	0.079	0.024	0.114	0.081
			subvalenceD_aWCVTZ	Te	Se	S	All	Te	Se	S	All	Te	Se	S	All		DF-MP2	0.097	0.031	0.058	0.068	0.047	0.045	0.079	0.059	0.056	0.068	0.1	0.077
		Normal	HF	0.28	0.224	1.082	0.658	0.42	0.065	0.533	0.393	0.565	0.233	0.55	0.475		DF-CCSD	0.093	0.089	0.171	0.123	0.098	0.083	0.14	0.11	0.103	0.076	0.111	0.098
			PNO-LMP2	1.796	1.142	0.794	1.311	2.592	1.664	1.224	1.914	3.397	2.195	1.66	2.524		CCSD-MP2	0.167	0.072	0.114	0.124	0.112	0.044	0.064	0.079	0.06	0.033	0.026	0.042
			PNO-LCCSD	1.915	1.192	0.853	1.392	2.618	1.669	1.246	1.931	3.325	2.15	1.641	2.475
			PNO-LCCSD(T)	2.132	1.399	1.008	1.583	2.91	1.925	1.433	2.178	3.693	2.454	1.862	2.776
			(T)	0.23	0.213	0.157	0.202	0.303	0.259	0.189	0.255	0.377	0.307	0.222	0.308
			CCSD(T)-MP2	0.357	0.282	0.227	0.294	0.333	0.274	0.215	0.278	0.309	0.267	0.204	0.263
			CCSD-MP2	0.172	0.133	0.102	0.139	0.1	0.102	0.063	0.09	0.106	0.096	0.045	0.087
			subvalenceD_aWCVQZ
			HF	0.017	0.052	0.133	0.083	0.046	0.015	0.123	0.076	0.079	0.024	0.114	0.081
			PNO-LMP2	0.861	0.639	0.466	0.675	1.263	0.872	0.661	0.965	1.672	1.117	0.863	1.263
			PNO-LCCSD	0.853	0.604	0.475	0.663	1.146	0.791	0.616	0.879	1.443	0.984	0.76	1.099
			PNO-LCCSD(T)	0.989	0.752	0.569	0.789	1.307	0.951	0.716	1.021	1.628	1.154	0.865	1.256
			(T)	0.142	0.151	0.095	0.132	0.167	0.162	0.1	0.146	0.191	0.173	0.105	0.161
			CCSD(T)-MP2	0.154	0.156	0.126	0.146	0.081	0.107	0.07	0.087	0.079	0.061	0.027	0.06
			CCSD-MP2	0.071	0.102	0.069	0.082	0.125	0.108	0.063	0.102	0.232	0.145	0.107	0.169
			subvalenceD_aWCVTQZ
			HF	0.097	0.025	0.632	0.369	0.111	0.03	0.372	0.225	0.125	0.064	0.228	0.155
			PNO-LMP2	0.139	0.261	0.192	0.204	0.119	0.207	0.158	0.165	0.128	0.162	0.135	0.142
			PNO-LCCSD	0.158	0.222	0.217	0.201	0.155	0.196	0.179	0.177	0.155	0.176	0.143	0.159
			PNO-LCCSD(T)	0.226	0.322	0.267	0.275	0.219	0.284	0.214	0.241	0.212	0.25	0.164	0.212
			(T)	0.079	0.106	0.05	0.082	0.069	0.091	0.035	0.069	0.06	0.075	0.021	0.057
			CCSD(T)-MP2	0.193	0.17	0.122	0.164	0.142	0.145	0.081	0.126	0.096	0.121	0.042	0.092
			CCSD-MP2	0.119	0.108	0.086	0.105	0.078	0.086	0.055	0.074	0.041	0.066	0.027	0.047
			subvalenceD_aWCV5Z
			HF	0.012	0.011	0.049	0.03	0.016	0.005	0.043	0.026	0.02	0.002	0.036	0.024
			PNO-LMP2	0.508	0.407	0.273	0.408	0.708	0.514	0.377	0.55	0.916	0.632	0.489	0.702
			PNO-LCCSD	0.454	0.341	0.235	0.355	0.562	0.414	0.3	0.439	0.673	0.489	0.366	0.525
			PNO-LCCSD(T)	0.551	0.445	0.291	0.442	0.663	0.517	0.356	0.527	0.776	0.591	0.423	0.614
			(T)	0.101	0.105	0.056	0.09	0.105	0.105	0.056	0.091	0.109	0.104	0.057	0.093
			CCSD(T)-MP2	0.085	0.102	0.056	0.083	0.073	0.06	0.04	0.06	0.151	0.054	0.071	0.101
			CCSD-MP2	0.079	0.099	0.058	0.08	0.151	0.114	0.083	0.119	0.245	0.148	0.125	0.18
			subvalenceD_aWCVQ5Z
			HF	0.012	0.01	0.006	0.01	0	0	0	0	0.012	0.01	0.006	0.01
			PNO-LMP2	0.146	0.171	0.095	0.141	0.124	0.145	0.072	0.118	0.108	0.122	0.058	0.1
			PNO-LCCSD	0.113	0.113	0.057	0.098	0.079	0.089	0.038	0.072	0.085	0.071	0.022	0.065
			PNO-LCCSD(T)	0.173	0.173	0.067	0.147	0.119	0.137	0.046	0.108	0.096	0.105	0.029	0.084
			(T)	0.067	0.068	0.025	0.057	0.056	0.058	0.021	0.048	0.046	0.049	0.018	0.04
			CCSD(T)-MP2	0.098	0.103	0.041	0.085	0.062	0.079	0.034	0.062	0.049	0.057	0.036	0.048
			CCSD-MP2	0.063	0.08	0.041	0.063	0.054	0.066	0.041	0.055	0.063	0.055	0.046	0.055
		vTight	subvalenceD_aWCVTZ	Te	Se	S	All	Te	Se	S	All	Te	Se	S	All
			HF	0.28	0.224	1.082	0.658	0.42	0.065	0.533	0.393	0.565	0.233	0.55	0.475
			PNO-LMP2	1.708	0.998	0.673	1.206	2.524	1.552	1.131	1.831	3.346	2.111	1.597	2.463
			PNO-LCCSD	1.829	1.026	0.742	1.284	2.521	1.502	1.139	1.817	3.217	1.985	1.543	2.357
			PNO-LCCSD(T)	1.917	1.076	0.783	1.347	2.692	1.607	1.218	1.942	3.472	2.144	1.662	2.544
			(T)	0.09	0.051	0.041	0.065	0.172	0.106	0.08	0.126	0.256	0.161	0.119	0.188
			CCSD(T)-MP2	0.215	0.078	0.112	0.147	0.174	0.057	0.089	0.118	0.134	0.037	0.067	0.089
			CCSD-MP2	0.126	0.033	0.072	0.086	0.025	0.057	0.014	0.037	0.132	0.13	0.055	0.112
			subvalenceD_aWCVQZ
			HF	0.017	0.052	0.133	0.083	0.046	0.015	0.123	0.076	0.079	0.024	0.114	0.081
			PNO-LMP2	0.786	0.497	0.363	0.576	1.208	0.774	0.593	0.896	1.633	1.053	0.826	1.219
			PNO-LCCSD	0.796	0.471	0.398	0.581	1.087	0.664	0.545	0.8	1.379	0.858	0.693	1.02
			PNO-LCCSD(T)	0.809	0.467	0.396	0.586	1.13	0.677	0.555	0.825	1.453	0.89	0.716	1.067
			(T)	0.03	0.009	0.006	0.018	0.049	0.015	0.011	0.03	0.076	0.033	0.024	0.05
			CCSD(T)-MP2	0.042	0.031	0.038	0.037	0.088	0.097	0.041	0.079	0.186	0.164	0.111	0.157
			CCSD-MP2	0.033	0.026	0.039	0.033	0.124	0.111	0.049	0.1	0.255	0.195	0.133	0.201
			subvalenceD_aWCVTQZ
			HF	0.097	0.025	0.632	0.369	0.111	0.03	0.372	0.225	0.125	0.064	0.228	0.155
			PNO-LMP2	0.062	0.04	0.088	0.066	0.032	0.063	0.103	0.072	0.078	0.088	0.121	0.097
			PNO-LCCSD	0.076	0.084	0.163	0.115	0.086	0.078	0.13	0.101	0.095	0.071	0.098	0.089
			PNO-LCCSD(T)	0.039	0.044	0.13	0.082	0.041	0.034	0.09	0.06	0.043	0.029	0.054	0.043
			(T)	0.056	0.046	0.035	0.047	0.063	0.055	0.041	0.054	0.071	0.063	0.047	0.061
			CCSD(T)-MP2	0.093	0.014	0.046	0.061	0.049	0.04	0.021	0.039	0.058	0.078	0.072	0.07
			CCSD-MP2	0.133	0.046	0.078	0.093	0.084	0.016	0.029	0.052	0.043	0.018	0.026	0.031
			subvalenceD_aWCVTZ	Te	Se	S	All	Te	Se	S	All	Te	Se	S	All
			HF	0.28	0.224	1.082	0.658	0.42	0.065	0.533	0.393	0.565	0.233	0.55	0.475
			DF-MP2	1.683	0.975	0.654	1.185	2.499	1.528	1.11	1.808	3.322	2.09	1.578	2.442
			DF-CCSD	1.79	0.979	0.706	1.246	2.479	1.451	1.1	1.776	3.175	1.934	1.504	2.316
			CCSD-MP2	0.113	0.051	0.056	0.079	0.054	0.098	0.03	0.067	0.159	0.169	0.081	0.142
			subvalenceD_aWCVQZ	Te	Se	S	All	Te	Se	S	All	Te	Se	S	All
			HF	0.017	0.052	0.133	0.083	0.046	0.015	0.123	0.076	0.079	0.024	0.114	0.081
			DF-MP2	0.76	0.473	0.341	0.553	1.181	0.749	0.571	0.872	1.608	1.032	0.806	1.197
			DF-CCSD	0.785	0.451	0.389	0.569	1.072	0.64	0.535	0.784	1.362	0.833	0.683	1.003
			CCSD-MP2	0.038	0.043	0.052	0.045	0.116	0.119	0.042	0.099	0.25	0.205	0.126	0.2
			subvalenceD_aWCVTQZ	Te	Se	S	All	Te	Se	S	All	Te	Se	S	All
			HF	0.017	0.052	0.133	0.083	0.046	0.015	0.123	0.076	0.079	0.024	0.114	0.081
			DF-MP2	0.097	0.031	0.058	0.068	0.047	0.045	0.079	0.059	0.056	0.068	0.1	0.077
			DF-CCSD	0.093	0.089	0.171	0.123	0.098	0.083	0.14	0.11	0.103	0.076	0.111	0.098
			CCSD-MP2	0.167	0.072	0.114	0.124	0.112	0.044	0.064	0.079	0.06	0.033	0.026	0.042

## Sheet: Table S4
		Table S4: RMS Deviations (kcal/mol) for different components of total interaction energies computed across different basis sets utilizing localized and canonical approaches. The statistics pertain to `subvalence(n$-$1)d` electron correlation.
			Raw		Half-CP		CP
		subvalenceD_aWCVTZ	Te	Se	Te	Se	Te	Se
	tight	Diff_PNO-LMP2	0.279	0.109	0.379	0.069	0.529	0.092
		Diff_PNO-LCCSD	0.229	0.155	0.258	0.1	0.372	0.068
		Diff_PNO-LCCSD(T)	0.257	0.173	0.282	0.113	0.402	0.076
		Diff_(T)	0.029	0.017	0.026	0.013	0.032	0.01
		Diff_CCSD-MP2	0.134	0.056	0.151	0.063	0.169	0.071
		subvalenceD_aWCVQZ
	tight	Diff_PNO-LMP2	0.129	0.045	0.16	0.033	0.232	0.046
		Diff_PNO-LCCSD	0.109	0.06	0.118	0.038	0.178	0.031
		Diff_PNO-LCCSD(T)	0.121	0.067	0.129	0.044	0.192	0.033
		Diff_(T)	0.012	0.007	0.012	0.006	0.015	0.005
		Diff_CCSD-MP2	0.037	0.022	0.046	0.024	0.055	0.027
		subvalenceD_aWCVTQZ
	tight	Diff_PNO-LMP2	0.078	0.019	0.06	0.012	0.043	0.005
		Diff_PNO-LCCSD	0.029	0.011	0.021	0.013	0.045	0.015
		Diff_PNO-LCCSD(T)	0.028	0.012	0.023	0.013	0.047	0.014
		Diff_(T)	0.004	0.001	0.003	0.001	0.002	0.002
		Diff_CCSD-MP2	0.062	0.01	0.075	0.004	0.088	0.011
		subvalenceD_aWCV5Z
	tight	Diff_PNO-LMP2	0.071	0.023	0.087	0.018	0.117	0.024
		Diff_PNO-LCCSD	0.051	0.028	0.057	0.018	0.079	0.014
		Diff_PNO-LCCSD(T)	0.055	0.031	0.062	0.021	0.084	0.015
		Diff_(T)	0.005	0.002	0.005	0.003	0.006	0.003
		Diff_CCSD-MP2	0.026	0.01	0.032	0.012	0.039	0.015
		subvalenceD_aWCVQ5Z
	tight	Diff_PNO-LMP2	0.027	0.005	REF		0.027	0.005
		Diff_PNO-LCCSD	0.017	0.002			0.017	0.002
		Diff_PNO-LCCSD(T)	0.02	0.003			0.02	0.003
		Diff_(T)	0.003	0.001			0.003	0.001
		Diff_CCSD-MP2	0.01	0.003			0.01	0.003
	Default	subvalenceD_aWCVTZ
		Diff_PNO-LMP2	0.268	0.097	0.376	0.062	0.529	0.091
		Diff_PNO-LCCSD	0.234	0.138	0.275	0.086	0.396	0.072
		Diff_PNO-LCCSD(T)	0.248	0.134	0.307	0.084	0.446	0.082
		Diff_(T)	0.023	0.01	0.037	0.013	0.052	0.017
		Diff_CCSD-MP2	0.13	0.047	0.141	0.049	0.152	0.051
		subvalenceD_aWCVQZ
		Diff_PNO-LMP2	0.121	0.035	0.157	0.028	0.232	0.046
		Diff_PNO-LCCSD	0.104	0.049	0.122	0.033	0.189	0.042
		Diff_PNO-LCCSD(T)	0.104	0.039	0.143	0.035	0.221	0.055
		Diff_(T)	0.024	0.017	0.03	0.017	0.036	0.018
		Diff_CCSD-MP2	0.04	0.019	0.044	0.015	0.049	0.012
		subvalenceD_aWCVTQZ
		Diff_PNO-LMP2	0.078	0.03	0.06	0.016	0.043	0.005
		Diff_PNO-LCCSD	0.022	0.021	0.019	0.025	0.051	0.031
		Diff_PNO-LCCSD(T)	0.016	0.043	0.044	0.046	0.077	0.05
		Diff_(T)	0.029	0.023	0.028	0.021	0.028	0.02
		Diff_CCSD-MP2	0.061	0.017	0.077	0.016	0.093	0.027
		subvalenceD_aWCV5Z
		Diff_PNO-LMP2	0.067	0.018	0.086	0.015	0.117	0.024
		Diff_PNO-LCCSD	0.05	0.024	0.062	0.02	0.087	0.027
		Diff_PNO-LCCSD(T)	0.054	0.02	0.079	0.028	0.11	0.04
		Diff_(T)	0.028	0.02	0.028	0.019	0.029	0.018
		Diff_CCSD-MP2	0.029	0.01	0.033	0.009	0.037	0.008
		subvalenceD_aWCVQ5Z
		Diff_PNO-LMP2	0.027	0.004	0.003	0.001	0.028	0.005
		Diff_PNO-LCCSD	0.025	0.013	0.017	0.013	0.024	0.013
		Diff_PNO-LCCSD(T)	0.054	0.031	0.034	0.029	0.019	0.027
		Diff_(T)	0.032	0.022	0.028	0.02	0.024	0.018
		Diff_CCSD-MP2	0.015	0.011	0.015	0.013	0.02	0.015
	vTight	subvalenceD_aWCVTZ
		Diff_PNO-LMP2	0.279	0.109	0.378	0.069	0.528	0.092
		Diff_PNO-LCCSD	0.238	0.155	0.259	0.098	0.368	0.068
		Diff_PNO-LCCSD(T)	0.269	0.173	0.282	0.112	0.396	0.075
		Diff_(T)	0.033	0.019	0.027	0.015	0.031	0.011
		Diff_CCSD-MP2	0.139	0.055	0.157	0.06	0.175	0.066
		subvalenceD_aWCVQZ
		Diff_PNO-LMP2	0.13	0.045	0.159	0.033	0.231	0.046
		Diff_PNO-LCCSD	0.109	0.058	0.117	0.036	0.176	0.03
		Diff_PNO-LCCSD(T)	0.124	0.067	0.127	0.042	0.186	0.031
		Diff_(T)	0.017	0.009	0.014	0.008	0.014	0.006
		Diff_CCSD-MP2	0.037	0.02	0.046	0.022	0.056	0.024
		subvalenceD_aWCVTQZ
		Diff_PNO-LMP2	0.081	0.018	0.062	0.011	0.045	0.005
		Diff_PNO-LCCSD	0.021	0.013	0.02	0.015	0.047	0.017
		Diff_PNO-LCCSD(T)	0.027	0.011	0.018	0.012	0.041	0.013
		Diff_(T)	0.006	0.002	0.007	0.003	0.008	0.004
		Diff_CCSD-MP2	0.067	0.008	0.079	0.004	0.092	0.012
		Canonical
		subvalenceD_aWCVTZ
		Diff_DF-MP2	0.283	0.111	0.379	0.07	0.528	0.092
		Diff_DF-CCSD	0.242	0.151	0.259	0.092	0.368	0.057
		Diff_CCSD-MP2	0.143	0.057	0.159	0.064	0.175	0.07
		subvalenceD_aWCVQZ
		Diff_DF-MP2	0.132	0.047	0.159	0.033	0.231	0.046
		Diff_DF-CCSD	0.105	0.051	0.116	0.029	0.177	0.026
		Diff_CCSD-MP2	0.04	0.022	0.047	0.024	0.055	0.026
		subvalenceD_aWCVTQZ
		Diff_DF-MP2	0.081	0.017	0.063	0.011	0.045	0.005
		Diff_DF-CCSD	0.016	0.023	0.027	0.024	0.055	0.026
		Diff_CCSD-MP2	0.077	0.011	0.088	0.016	0.1	0.023

## Sheet: Table S2
			Table S2: RMS Deviations (kcal/mol) for different components of total interaction energies computed across different basis sets utilizing localized and canonical approaches. The statistics pertain to `valence` electron correlation.
				Raw				Half-CP				CP
			valence_aWCVTZ	Te	Se	S	All	Te	Se	S	All	Te	Se	S	All
		Tight	HF	0.28	0.224	1.082	0.658	0.42	0.065	0.533	0.393	0.565	0.233	0.55	0.475
			PNO-LMP2	1.622	1.081	0.685	1.193	2.259	1.566	1.142	1.718	2.895	2.052	1.607	2.249
			PNO-LCCSD	1.876	1.173	0.757	1.35	2.409	1.593	1.158	1.796	2.942	2.015	1.565	2.248
			PNO-LCCSD(T)	2.025	1.29	0.843	1.469	2.623	1.76	1.285	1.969	3.222	2.233	1.732	2.474
			(T)	0.156	0.121	0.089	0.125	0.22	0.17	0.129	0.177	0.285	0.22	0.169	0.229
			CCSD(T)-MP2	0.407	0.212	0.164	0.281	0.369	0.198	0.145	0.256	0.332	0.184	0.127	0.231
			CCSD-MP2	0.258	0.093	0.076	0.164	0.157	0.03	0.02	0.093	0.066	0.039	0.044	0.051
			valence_aWCVQZ
		Tight	HF	0.017	0.052	0.133	0.083	0.046	0.015	0.123	0.076	0.079	0.024	0.114	0.081
			PNO-LMP2	0.794	0.528	0.37	0.591	1.119	0.774	0.599	0.858	1.443	1.02	0.829	1.127
			PNO-LCCSD	0.822	0.509	0.406	0.606	1.03	0.677	0.553	0.78	1.239	0.845	0.701	0.956
			PNO-LCCSD(T)	0.902	0.571	0.451	0.669	1.131	0.755	0.61	0.861	1.361	0.939	0.77	1.053
			(T)	0.082	0.064	0.046	0.066	0.103	0.08	0.057	0.082	0.125	0.095	0.069	0.099
			CCSD(T)-MP2	0.115	0.045	0.084	0.086	0.043	0.023	0.017	0.03	0.093	0.082	0.061	0.08
			CCSD-MP2	0.04	0.021	0.039	0.035	0.093	0.098	0.046	0.082	0.207	0.175	0.129	0.173
			valence_aWCVTQZ
		Tight	HF	0.097	0.025	0.632	0.369	0.111	0.03	0.372	0.225	0.125	0.064	0.228	0.155
			PNO-LMP2	0.046	0.025	0.091	0.061	0.082	0.052	0.103	0.082	0.121	0.08	0.118	0.108
			PNO-LCCSD	0.088	0.047	0.165	0.111	0.068	0.042	0.131	0.088	0.049	0.038	0.098	0.067
			PNO-LCCSD(T)	0.117	0.068	0.18	0.13	0.086	0.053	0.136	0.098	0.056	0.042	0.094	0.068
			(T)	0.03	0.022	0.016	0.023	0.019	0.013	0.007	0.014	0.009	0.005	0.004	0.006
			CCSD(T)-MP2	0.083	0.045	0.091	0.076	0.032	0.013	0.035	0.029	0.069	0.048	0.03	0.052
			CCSD-MP2	0.055	0.024	0.078	0.057	0.03	0.019	0.031	0.027	0.075	0.052	0.027	0.055
			valence_aWCV5Z
		Tight	HF	0.012	0.011	0.049	0.03	0.016	0.005	0.043	0.026	0.02	0.002	0.036	0.024
			PNO-LMP2	0.433	0.293	0.191	0.322	0.612	0.423	0.328	0.469	0.791	0.554	0.465	0.619
			PNO-LCCSD	0.415	0.263	0.195	0.305	0.496	0.326	0.267	0.376	0.578	0.39	0.338	0.447
			PNO-LCCSD(T)	0.455	0.293	0.216	0.337	0.542	0.361	0.292	0.412	0.628	0.429	0.368	0.488
			(T)	0.041	0.031	0.021	0.032	0.046	0.036	0.026	0.037	0.052	0.04	0.03	0.042
			CCSD(T)-MP2	0.029	0.008	0.029	0.024	0.073	0.063	0.036	0.059	0.164	0.125	0.097	0.132
			CCSD-MP2	0.023	0.031	0.011	0.023	0.116	0.097	0.061	0.095	0.214	0.165	0.127	0.172
			valence_aWCVQ5Z
		Tight	HF	0.012	0.01	0.006	0.01	REF				0.012	0.01	0.006	0.01
			PNO-LMP2	0.008	0.014	0.026	0.018					0.008	0.014	0.026	0.018
			PNO-LCCSD	0.038	0.036	0.006	0.03					0.038	0.036	0.006	0.03
			PNO-LCCSD(T)	0.045	0.041	0.007	0.035					0.045	0.041	0.007	0.035
			(T)	0.008	0.005	0.002	0.006					0.008	0.005	0.002	0.006
			CCSD(T)-MP2	0.047	0.03	0.026	0.036					0.047	0.03	0.026	0.036
			CCSD-MP2	0.039	0.025	0.025	0.03					0.039	0.025	0.025	0.03
			valence_aWCVTZ
		Normal	HF	0.28	0.224	1.082	0.658	0.42	0.065	0.533	0.393	0.565	0.233	0.55	0.475
			PNO-LMP2	1.704	1.213	0.794	1.292	2.318	1.667	1.224	1.793	2.937	2.126	1.66	2.303
			PNO-LCCSD	1.945	1.306	0.853	1.44	2.477	1.717	1.246	1.883	3.011	2.13	1.641	2.331
			PNO-LCCSD(T)	2.154	1.507	1.008	1.625	2.744	1.962	1.433	2.116	3.337	2.419	1.862	2.611
			(T)	0.22	0.205	0.157	0.196	0.276	0.248	0.189	0.241	0.334	0.292	0.222	0.286
			CCSD(T)-MP2	0.458	0.313	0.227	0.346	0.43	0.305	0.215	0.329	0.403	0.298	0.204	0.312
			CCSD-MP2	0.269	0.149	0.102	0.187	0.181	0.105	0.063	0.126	0.095	0.073	0.045	0.074
			valence_aWCVQZ
		Normal	HF	0.017	0.052	0.133	0.083	0.046	0.015	0.123	0.076	0.079	0.024	0.114	0.081
			PNO-LMP2	0.859	0.66	0.466	0.681	1.165	0.866	0.661	0.921	1.477	1.083	0.863	1.169
			PNO-LCCSD	0.88	0.641	0.475	0.686	1.083	0.798	0.616	0.854	1.288	0.959	0.76	1.026
			PNO-LCCSD(T)	0.997	0.774	0.569	0.799	1.218	0.941	0.716	0.98	1.441	1.112	0.865	1.164
			(T)	0.121	0.135	0.095	0.118	0.139	0.145	0.1	0.13	0.158	0.155	0.105	0.141
			CCSD(T)-MP2	0.149	0.15	0.126	0.142	0.067	0.098	0.07	0.08	0.061	0.051	0.027	0.048
			CCSD-MP2	0.06	0.091	0.069	0.074	0.087	0.094	0.063	0.082	0.189	0.133	0.107	0.147
			valence_aWCVTQZ
		Normal	HF	0.097	0.025	0.632	0.369	0.111	0.03	0.372	0.225	0.125	0.064	0.228	0.155
			PNO-LMP2	0.136	0.235	0.192	0.192	0.142	0.193	0.158	0.166	0.159	0.16	0.135	0.152
			PNO-LCCSD	0.17	0.206	0.217	0.199	0.147	0.177	0.179	0.168	0.125	0.152	0.143	0.14
			PNO-LCCSD(T)	0.215	0.283	0.267	0.257	0.185	0.244	0.214	0.215	0.156	0.207	0.164	0.177
			(T)	0.05	0.083	0.05	0.063	0.041	0.07	0.035	0.051	0.034	0.056	0.021	0.04
			CCSD(T)-MP2	0.109	0.149	0.122	0.128	0.052	0.113	0.081	0.086	0.06	0.078	0.042	0.062
			CCSD-MP2	0.06	0.099	0.086	0.083	0.02	0.073	0.055	0.054	0.064	0.049	0.027	0.049
			valence_aWCV5Z
		Normal	HF	0.012	0.011	0.049	0.03	0.016	0.005	0.043	0.026	0.02	0.002	0.036	0.024
			PNO-LMP2	0.498	0.416	0.273	0.407	0.658	0.512	0.377	0.528	0.823	0.617	0.489	0.658
			PNO-LCCSD	0.461	0.357	0.235	0.363	0.535	0.415	0.3	0.427	0.61	0.475	0.366	0.494
			PNO-LCCSD(T)	0.533	0.441	0.291	0.434	0.609	0.5	0.356	0.499	0.687	0.56	0.423	0.567
			(T)	0.074	0.086	0.056	0.073	0.078	0.086	0.056	0.075	0.082	0.086	0.057	0.076
			CCSD(T)-MP2	0.059	0.084	0.056	0.068	0.06	0.05	0.04	0.051	0.144	0.062	0.071	0.099
			CCSD-MP2	0.057	0.089	0.058	0.07	0.125	0.106	0.083	0.106	0.215	0.144	0.125	0.166
			valence_aWCVQ5Z
		Normal	HF	0.012	0.01	0.006	0.01	0	0	0	0	0.012	0.01	0.006	0.01
			PNO-LMP2	0.142	0.169	0.095	0.139	0.127	0.146	0.072	0.119	0.112	0.124	0.058	0.102
			PNO-LCCSD	0.112	0.114	0.057	0.098	0.092	0.093	0.038	0.079	0.091	0.079	0.022	0.07
			PNO-LCCSD(T)	0.143	0.153	0.067	0.127	0.115	0.123	0.046	0.101	0.106	0.099	0.029	0.085
			(T)	0.036	0.046	0.025	0.037	0.03	0.039	0.021	0.031	0.027	0.032	0.018	0.026
			CCSD(T)-MP2	0.07	0.079	0.041	0.065	0.036	0.055	0.034	0.043	0.053	0.034	0.036	0.042
			CCSD-MP2	0.054	0.07	0.041	0.056	0.04	0.057	0.041	0.047	0.062	0.048	0.046	0.053
			valence_aWCVTZ
		vTight	HF	0.28	0.224	1.082	0.658	0.42	0.065	0.533	0.393	0.565	0.233	0.55	0.475
			PNO-LMP2	1.602	1.066	0.673	1.177	2.241	1.552	1.131	1.704	2.88	2.041	1.597	2.237
			PNO-LCCSD	1.86	1.146	0.742	1.332	2.391	1.562	1.139	1.775	2.922	1.979	1.543	2.224
			PNO-LCCSD(T)	1.965	1.213	0.783	1.408	2.563	1.679	1.218	1.904	3.162	2.147	1.662	2.406
			(T)	0.108	0.069	0.041	0.078	0.175	0.119	0.08	0.13	0.242	0.169	0.119	0.184
			CCSD(T)-MP2	0.368	0.148	0.112	0.238	0.328	0.128	0.089	0.21	0.289	0.107	0.067	0.182
			CCSD-MP2	0.262	0.082	0.072	0.164	0.158	0.022	0.014	0.092	0.064	0.066	0.055	0.062
			valence_aWCVQZ
		vTight	HF	0.017	0.052	0.133	0.083	0.046	0.015	0.123	0.076	0.079	0.024	0.114	0.081
			PNO-LMP2	0.778	0.52	0.363	0.579	1.106	0.768	0.593	0.849	1.434	1.017	0.826	1.122
			PNO-LCCSD	0.818	0.514	0.398	0.603	1.024	0.68	0.545	0.776	1.231	0.846	0.693	0.951
			PNO-LCCSD(T)	0.839	0.518	0.396	0.613	1.069	0.7	0.555	0.805	1.3	0.884	0.716	0.998
			(T)	0.028	0.009	0.006	0.017	0.048	0.022	0.011	0.031	0.072	0.038	0.024	0.049
			CCSD(T)-MP2	0.075	0.009	0.038	0.049	0.058	0.068	0.041	0.057	0.141	0.134	0.111	0.129
			CCSD-MP2	0.049	0.009	0.039	0.036	0.086	0.089	0.049	0.077	0.205	0.172	0.133	0.173
			valence_aWCVTQZ
		vTight	HF	0.097	0.025	0.632	0.369	0.111	0.03	0.372	0.225	0.125	0.064	0.228	0.155
			PNO-LMP2	0.036	0.023	0.088	0.057	0.074	0.052	0.104	0.079	0.116	0.083	0.121	0.108
			PNO-LCCSD	0.093	0.072	0.163	0.116	0.072	0.064	0.13	0.094	0.052	0.055	0.098	0.072
			PNO-LCCSD(T)	0.051	0.035	0.13	0.083	0.028	0.027	0.09	0.057	0.023	0.029	0.054	0.037
			(T)	0.05	0.044	0.035	0.044	0.056	0.052	0.041	0.05	0.063	0.059	0.047	0.057
			CCSD(T)-MP2	0.039	0.016	0.045	0.036	0.058	0.04	0.021	0.043	0.124	0.086	0.072	0.097
			CCSD-MP2	0.07	0.052	0.078	0.067	0.03	0.014	0.029	0.025	0.072	0.029	0.026	0.047

## Sheet: Table S3
			Table S3: RMS Deviations (kcal/mol) for different components of total interaction energies computed across different basis sets utilizing localized and canonical approaches. The statistics pertain to `valence + subvalence(n$-$1)spd` electron correlation.
				Raw				Half-CP				CP
			subvalenceSPD_aWCVTZ	Te	Se	S	All	Te	Se	S	All	Te	Se	S	All
		Tight	HF	0.28	0.224	1.082	0.658	0.42	0.065	0.533	0.393	0.565	0.233	0.55	0.475
			PNO-LMP2	1.359	0.739	0.426	0.926	2.499	1.496	1.054	1.788	3.655	2.275	1.732	2.679
			PNO-LCCSD	1.443	0.747	0.462	0.976	2.482	1.441	1.041	1.763	3.534	2.158	1.663	2.576
			PNO-LCCSD(T)	1.54	0.824	0.534	1.054	2.665	1.577	1.162	1.91	3.803	2.352	1.825	2.788
			(T)	0.101	0.083	0.083	0.09	0.187	0.14	0.123	0.152	0.272	0.196	0.164	0.215
			CCSD(T)-MP2	0.196	0.088	0.127	0.144	0.178	0.084	0.111	0.13	0.16	0.08	0.095	0.117
			CCSD-MP2	0.096	0.02	0.046	0.062	0.039	0.061	0.016	0.042	0.127	0.119	0.07	0.108
			subvalenceSPD_aWCVQZ
		Tight	HF	0.017	0.052	0.133	0.083	0.046	0.015	0.123	0.076	0.079	0.024	0.114	0.081
			PNO-LMP2	0.726	0.441	0.367	0.534	1.281	0.8	0.65	0.949	1.842	1.167	0.937	1.37
			PNO-LCCSD	0.694	0.386	0.393	0.511	1.127	0.664	0.594	0.829	1.565	0.951	0.796	1.153
			PNO-LCCSD(T)	0.75	0.431	0.436	0.56	1.214	0.728	0.649	0.899	1.682	1.033	0.864	1.244
			(T)	0.059	0.049	0.045	0.051	0.089	0.066	0.056	0.072	0.119	0.083	0.068	0.093
			CCSD(T)-MP2	0.051	0.019	0.074	0.053	0.078	0.075	0.012	0.063	0.165	0.136	0.075	0.131
			CCSD-MP2	0.045	0.062	0.03	0.047	0.157	0.14	0.057	0.126	0.279	0.218	0.142	0.22
			subvalenceSPD_aWCVTQZ
		Tight	HF	0.097	0.025	0.632	0.369	0.111	0.03	0.372	0.225	0.125	0.064	0.228	0.155
			PNO-LMP2	0.155	0.175	0.372	0.254	0.171	0.165	0.289	0.216	0.189	0.157	0.211	0.187
			PNO-LCCSD	0.17	0.136	0.383	0.254	0.178	0.124	0.285	0.207	0.187	0.113	0.19	0.167
			PNO-LCCSD(T)	0.198	0.159	0.401	0.274	0.195	0.137	0.292	0.218	0.194	0.116	0.188	0.17
			(T)	0.029	0.023	0.019	0.024	0.018	0.013	0.009	0.014	0.008	0.004	0.004	0.006
			CCSD(T)-MP2	0.062	0.038	0.039	0.048	0.049	0.046	0.02	0.04	0.041	0.056	0.03	0.043
			CCSD-MP2	0.043	0.054	0.03	0.044	0.04	0.054	0.02	0.04	0.039	0.055	0.027	0.042
			subvalenceSPD_aWCV5Z
		Tight	HF	0.012	0.011	0.049	0.03	0.016	0.005	0.043	0.026	0.02	0.002	0.036	0.024
			PNO-LMP2	0.371	0.218	0.154	0.264	0.701	0.438	0.356	0.519	1.035	0.661	0.561	0.779
			PNO-LCCSD	0.315	0.169	0.148	0.223	0.543	0.32	0.286	0.4	0.773	0.475	0.425	0.579
			PNO-LCCSD(T)	0.346	0.193	0.168	0.249	0.582	0.349	0.311	0.431	0.82	0.508	0.455	0.616
			(T)	0.032	0.026	0.021	0.027	0.04	0.03	0.025	0.032	0.048	0.034	0.029	0.038
			CCSD(T)-MP2	0.034	0.026	0.022	0.028	0.12	0.09	0.045	0.091	0.215	0.154	0.107	0.165
			CCSD-MP2	0.058	0.051	0.011	0.045	0.159	0.119	0.07	0.121	0.262	0.187	0.136	0.202
			subvalenceSPD_aWCVQ5Z
		Tight	HF	0.012	0.01	0.006	0.01	REF				0.012	0.01	0.006	0.01
			PNO-LMP2	0.06	0.053	0.107	0.077					0.06	0.053	0.107	0.077
			PNO-LCCSD	0.038	0.035	0.081	0.056					0.038	0.035	0.081	0.056
			PNO-LCCSD(T)	0.028	0.029	0.08	0.051					0.028	0.029	0.08	0.051
			(T)	0.01	0.007	0.002	0.007					0.01	0.007	0.002	0.007
			CCSD(T)-MP2	0.032	0.025	0.028	0.029					0.032	0.025	0.028	0.029
			CCSD-MP2	0.022	0.018	0.026	0.022					0.022	0.018	0.026	0.022
			subvalenceSPD_aWCVTZ
		Normal	HF	0.28	0.224	1.082	0.658	0.42	0.065	0.533	0.393	0.565	0.233	0.55	0.475
			PNO-LMP2	1.445	0.907	0.534	1.032	2.557	1.618	1.159	1.871	3.69	2.35	1.802	2.732
			PNO-LCCSD	1.51	0.913	0.555	1.068	2.55	1.592	1.146	1.858	3.603	2.285	1.756	2.664
			PNO-LCCSD(T)	1.704	1.111	0.706	1.243	2.823	1.841	1.335	2.093	3.955	2.583	1.978	2.957
			(T)	0.211	0.205	0.159	0.193	0.285	0.253	0.191	0.246	0.362	0.301	0.223	0.301
			CCSD(T)-MP2	0.283	0.238	0.192	0.241	0.28	0.239	0.184	0.238	0.276	0.241	0.179	0.236
			CCSD-MP2	0.138	0.128	0.092	0.121	0.096	0.113	0.067	0.094	0.118	0.115	0.064	0.102
			subvalenceSPD_aWCVQZ
		Normal	HF	0.017	0.052	0.133	0.083	0.046	0.015	0.123	0.076	0.079	0.024	0.114	0.081
			PNO-LMP2	0.801	0.609	0.488	0.646	1.33	0.91	0.728	1.021	1.875	1.234	0.976	1.413
			PNO-LCCSD	0.754	0.542	0.484	0.604	1.184	0.805	0.672	0.913	1.622	1.079	0.863	1.23
			PNO-LCCSD(T)	0.888	0.694	0.582	0.732	1.344	0.969	0.776	1.056	1.808	1.253	0.972	1.389
			(T)	0.141	0.155	0.099	0.134	0.167	0.166	0.104	0.149	0.193	0.177	0.11	0.164
			CCSD(T)-MP2	0.117	0.139	0.12	0.126	0.061	0.091	0.066	0.074	0.09	0.05	0.028	0.062
			CCSD-MP2	0.079	0.116	0.071	0.091	0.152	0.13	0.073	0.123	0.255	0.167	0.117	0.189
			subvalenceSPD_aWCVTQZ
		Normal	HF	0.097	0.025	0.632	0.369	0.111	0.03	0.372	0.225	0.125	0.064	0.228	0.155
			PNO-LMP2	0.251	0.383	0.475	0.381	0.243	0.302	0.344	0.299	0.241	0.23	0.223	0.231
			PNO-LCCSD	0.255	0.31	0.458	0.352	0.256	0.269	0.346	0.293	0.259	0.239	0.239	0.246
			PNO-LCCSD(T)	0.342	0.424	0.513	0.432	0.336	0.371	0.387	0.365	0.331	0.326	0.265	0.309
			(T)	0.091	0.119	0.056	0.092	0.082	0.103	0.041	0.08	0.074	0.087	0.027	0.068
			CCSD(T)-MP2	0.119	0.132	0.088	0.115	0.107	0.122	0.068	0.102	0.098	0.116	0.052	0.093
			CCSD-MP2	0.048	0.109	0.075	0.082	0.04	0.083	0.05	0.061	0.036	0.063	0.032	0.046
			subvalenceSPD_aWCV5Z
		Normal	HF	0.012	0.011	0.049	0.03	0.016	0.005	0.043	0.026	0.02	0.002	0.036	0.024
			PNO-LMP2	0.462	0.398	0.291	0.39	0.754	0.548	0.431	0.593	1.066	0.725	0.589	0.818
			PNO-LCCSD	0.381	0.31	0.24	0.315	0.59	0.436	0.347	0.469	0.811	0.575	0.463	0.633
			PNO-LCCSD(T)	0.488	0.424	0.3	0.411	0.702	0.551	0.408	0.567	0.926	0.689	0.525	0.732
			(T)	0.111	0.117	0.062	0.1	0.116	0.116	0.062	0.101	0.121	0.115	0.062	0.103
			CCSD(T)-MP2	0.074	0.099	0.054	0.078	0.076	0.059	0.04	0.06	0.153	0.05	0.069	0.101
			CCSD-MP2	0.093	0.109	0.065	0.091	0.167	0.124	0.089	0.131	0.257	0.156	0.128	0.189
			subvalenceSPD_aWCVQ5Z
		Normal	HF	0.012	0.01	0.006	0.01	0	0	0	0	0.012	0.01	0.006	0.01
			PNO-LMP2	0.201	0.215	0.162	0.194	0.168	0.18	0.122	0.159	0.153	0.156	0.133	0.147
			PNO-LCCSD	0.144	0.137	0.121	0.134	0.119	0.124	0.084	0.11	0.104	0.122	0.097	0.108
			PNO-LCCSD(T)	0.195	0.201	0.129	0.178	0.178	0.191	0.102	0.162	0.165	0.186	0.119	0.159
			(T)	0.087	0.087	0.032	0.073	0.076	0.076	0.027	0.064	0.066	0.066	0.023	0.056
			CCSD(T)-MP2	0.102	0.112	0.046	0.091	0.074	0.095	0.036	0.072	0.054	0.079	0.032	0.058
			CCSD-MP2	0.066	0.086	0.048	0.068	0.058	0.072	0.043	0.059	0.058	0.058	0.041	0.053
			subvalenceSPD_aWCVTZ
		vTight	HF	0.28	0.224	1.082	0.658	0.42	0.065	0.533	0.393	0.565	0.233	0.55	0.475
			PNO-LMP2	1.338	0.724	0.415	0.91	2.48	1.482	1.042	1.773	3.638	2.264	1.722	2.666
			PNO-LCCSD	1.421	0.73	0.445	0.957	2.456	1.416	1.018	1.739	3.504	2.126	1.639	2.548
			PNO-LCCSD(T)	1.476	0.76	0.478	0.998	2.596	1.501	1.091	1.843	3.732	2.268	1.753	2.717
			(T)	0.061	0.031	0.035	0.044	0.142	0.087	0.074	0.105	0.229	0.144	0.114	0.17
			CCSD(T)-MP2	0.148	0.044	0.069	0.098	0.129	0.035	0.051	0.083	0.11	0.031	0.034	0.069
			CCSD-MP2	0.091	0.029	0.035	0.059	0.041	0.077	0.028	0.053	0.14	0.144	0.084	0.126
			subvalenceSPD_aWCVQZ
		vTight	HF	0.017	0.052	0.133	0.083	0.046	0.015	0.123	0.076	0.079	0.024	0.114	0.081
			PNO-LMP2	0.709	0.432	0.359	0.522	1.266	0.794	0.645	0.94	1.831	1.164	0.934	1.364
			PNO-LCCSD	0.692	0.39	0.384	0.509	1.123	0.668	0.585	0.826	1.559	0.954	0.788	1.149
			PNO-LCCSD(T)	0.691	0.38	0.38	0.506	1.151	0.675	0.594	0.843	1.619	0.979	0.809	1.188
			(T)	0.033	0.016	0.007	0.022	0.04	0.01	0.01	0.024	0.065	0.026	0.022	0.043
			CCSD(T)-MP2	0.047	0.06	0.027	0.047	0.125	0.123	0.054	0.106	0.218	0.187	0.126	0.181
			CCSD-MP2	0.034	0.046	0.03	0.037	0.146	0.128	0.061	0.118	0.274	0.211	0.147	0.217
			subvalenceSPD_aWCVTQZ
		vTight	HF	0.097	0.025	0.632	0.369	0.111	0.03	0.372	0.225	0.125	0.064	0.228	0.155
			PNO-LMP2	0.141	0.173	0.37	0.249	0.161	0.166	0.29	0.214	0.183	0.16	0.214	0.187
			PNO-LCCSD	0.185	0.157	0.386	0.263	0.191	0.146	0.287	0.216	0.197	0.136	0.192	0.177
			PNO-LCCSD(T)	0.142	0.118	0.355	0.231	0.139	0.1	0.249	0.174	0.138	0.084	0.146	0.126
			(T)	0.061	0.046	0.032	0.048	0.067	0.054	0.039	0.055	0.074	0.063	0.046	0.062
			CCSD(T)-MP2	0.051	0.067	0.026	0.051	0.057	0.077	0.045	0.061	0.07	0.088	0.071	0.077
			CCSD-MP2	0.056	0.026	0.028	0.039	0.046	0.024	0.016	0.031	0.04	0.026	0.026	0.032

## Sheet: Table S5
		Table S5: RMS Deviations (kcal/mol) for different components of total interaction energies computed across different basis sets utilizing localized and canonical approaches. The statistics pertain to `subvalence(n$-$1)sp` electron correlation.
		subvalenceD_aWCVTZ	Raw		Half-CP		CP
			Te	Se	Te	Se	Te	Se
	Tight	Diff_PNO-LMP2	0.395	0.304	0.07	0.081	0.293	0.153
		Diff_PNO-LCCSD	0.432	0.338	0.089	0.104	0.29	0.143
		Diff_PNO-LCCSD(T)	0.469	0.359	0.119	0.123	0.265	0.128
		Diff_(T)	0.037	0.021	0.033	0.019	0.029	0.017
		Diff_CCSD-MP2	0.038	0.035	0.022	0.024	0.011	0.014
		subvalenceD_aWCVQZ
	Tight	Diff_PNO-LMP2	0.095	0.078	0.063	0.027	0.198	0.111
		Diff_PNO-LCCSD	0.124	0.1	0.044	0.028	0.176	0.097
		Diff_PNO-LCCSD(T)	0.142	0.109	0.04	0.032	0.165	0.09
		Diff_(T)	0.018	0.009	0.015	0.009	0.013	0.008
		Diff_CCSD-MP2	0.031	0.022	0.027	0.02	0.024	0.018
		subvalenceD_aWCVTQZ
	Tight	Diff_PNO-LMP2	0.193	0.134	0.152	0.103	0.111	0.073
		Diff_PNO-LCCSD	0.105	0.08	0.101	0.072	0.097	0.064
		Diff_PNO-LCCSD(T)	0.102	0.08	0.098	0.072	0.096	0.064
		Diff_(T)	0.004	0.002	0.004	0.002	0.003	0.003
		Diff_CCSD-MP2	0.091	0.059	0.054	0.036	0.018	0.015
		subvalenceD_aWCV5Z
	Tight	Diff_PNO-LMP2	0.088	0.07	0.034	0.015	0.146	0.089
		Diff_PNO-LCCSD	0.106	0.081	0.021	0.014	0.132	0.082
		Diff_PNO-LCCSD(T)	0.114	0.085	0.02	0.015	0.127	0.079
		Diff_(T)	0.008	0.004	0.007	0.004	0.006	0.004
		Diff_CCSD-MP2	0.018	0.012	0.017	0.01	0.015	0.009
		subvalenceD_aWCVQ5Z
	Tight	Diff_PNO-LMP2	0.084	0.064	REF		0.084	0.064
		Diff_PNO-LCCSD	0.091	0.069			0.091	0.069
		Diff_PNO-LCCSD(T)	0.092	0.068			0.092	0.068
		Diff_(T)	0	0.001			0	0.001
		Diff_CCSD-MP2	0.008	0.005			0.008	0.005
		subvalenceD_aWCVTZ
	Normal	Diff_PNO-LMP2	0.375	0.26	0.058	0.059	0.294	0.156
		Diff_PNO-LCCSD	0.425	0.299	0.087	0.086	0.28	0.135
		Diff_PNO-LCCSD(T)	0.449	0.308	0.107	0.095	0.265	0.13
		Diff_(T)	0.025	0.011	0.022	0.01	0.018	0.009
		Diff_CCSD-MP2	0.051	0.04	0.034	0.032	0.018	0.024
		subvalenceD_aWCVQZ
	Normal	Diff_PNO-LMP2	0.087	0.062	0.072	0.043	0.203	0.117
		Diff_PNO-LCCSD	0.118	0.08	0.049	0.025	0.18	0.097
		Diff_PNO-LCCSD(T)	0.126	0.081	0.055	0.033	0.182	0.101
		Diff_(T)	0.012	0.009	0.011	0.009	0.011	0.009
		Diff_CCSD-MP2	0.035	0.026	0.03	0.025	0.025	0.024
		subvalenceD_aWCVTQZ
	Normal	Diff_PNO-LMP2	0.2	0.151	0.161	0.116	0.123	0.083
		Diff_PNO-LCCSD	0.115	0.094	0.113	0.081	0.113	0.071
		Diff_PNO-LCCSD(T)	0.128	0.108	0.127	0.093	0.127	0.081
		Diff_(T)	0.016	0.015	0.017	0.014	0.017	0.014
		Diff_CCSD-MP2	0.088	0.06	0.05	0.037	0.016	0.016
		subvalenceD_aWCV5Z
	Normal	Diff_PNO-LMP2	0.086	0.058	0.053	0.04	0.151	0.094
		Diff_PNO-LCCSD	0.103	0.062	0.04	0.029	0.139	0.088
		Diff_PNO-LCCSD(T)	0.103	0.061	0.055	0.042	0.15	0.098
		Diff_(T)	0.015	0.014	0.015	0.013	0.016	0.013
		Diff_CCSD-MP2	0.021	0.013	0.017	0.011	0.012	0.009
		subvalenceD_aWCVQ5Z
	Normal	Diff_PNO-LMP2	0.091	0.062	0.045	0.039	0.089	0.066
		Diff_PNO-LCCSD	0.094	0.057	0.041	0.038	0.102	0.08
		Diff_PNO-LCCSD(T)	0.092	0.06	0.061	0.056	0.122	0.096
		Diff_(T)	0.022	0.019	0.022	0.019	0.022	0.018
		Diff_CCSD-MP2	0.012	0.008	0.005	0.009	0.014	0.016
		subvalenceD_aWCVTZ
	vTight	Diff_PNO-LMP2	0.395	0.304	0.069	0.081	0.293	0.153
		Diff_PNO-LCCSD	0.433	0.331	0.089	0.102	0.288	0.142
		Diff_PNO-LCCSD(T)	0.468	0.352	0.119	0.121	0.262	0.126
		Diff_(T)	0.036	0.021	0.032	0.019	0.028	0.017
		Diff_CCSD-MP2	0.039	0.028	0.024	0.022	0.013	0.017
		subvalenceD_aWCVQZ
	vTight	Diff_PNO-LMP2	0.095	0.078	0.063	0.027	0.198	0.111
		Diff_PNO-LCCSD	0.12	0.1	0.046	0.028	0.18	0.097
		Diff_PNO-LCCSD(T)	0.138	0.108	0.041	0.032	0.167	0.091
		Diff_(T)	0.018	0.009	0.016	0.008	0.014	0.008
		Diff_CCSD-MP2	0.027	0.022	0.023	0.02	0.02	0.018
		subvalenceD_aWCVTQZ
	vTight	Diff_PNO-LMP2	0.193	0.134	0.152	0.103	0.111	0.073
		Diff_PNO-LCCSD	0.113	0.074	0.108	0.07	0.104	0.066
		Diff_PNO-LCCSD(T)	0.109	0.076	0.104	0.071	0.101	0.066
		Diff_(T)	0.005	0.002	0.005	0.002	0.004	0.002
		Diff_CCSD-MP2	0.083	0.065	0.046	0.038	0.011	0.013

## Sheet: Table S6
			Table S6: The (n$-$1)sp component of total interaction energies (in kcal/mol), computed at the PNO-LCCSD(T)(tight, haWCV{Q,5}Z) half-CP level. It includes breakdowns of the (n$-$1)sp contributions into MP2, CCSD, (T), CCSD-MP2, and CCSD(T)-MP2. Heatmapping is employed to illustrate the contribution's impact on dimer stability, ranging from blue (stabilizing) to red (destabilizing). Additionally, …
			Molecule	Diff_PNO-LMP2	Diff_PNO-LCCSD	Diff_(T)	Diff_PNO-LCCSD(T)	Diff_CCSD-MP2	CCSD(T)-MP2
			CHAL-CHAL-1_0.90	0.210286	0.277278	-0.1352	0.142078	0.066992	-0.068208
			CHAL-CHAL-1_0.95	0.090894	0.176965	-0.136919	0.040046	0.086071	-0.050848
			CHAL-CHAL-1_1.0	0.0215	0.114765	-0.137926	-0.023161	0.093265	-0.044661
			CHAL-CHAL-1_1.05	-0.010563	0.059956	-0.13151	-0.071554	0.070519	-0.060991
			CHAL-CHAL-1_1.10	-0.018023	0.052799	-0.128645	-0.075846	0.070822	-0.057823
			CHAL-CHAL-1_1.25	-0.012135	0.021797	-0.075896	-0.054099	0.033932	-0.041964
			CHAL-CHAL-1_1.50	0.002999	0.019703	-0.02781	-0.008106	0.016704	-0.011105
			CHAL-CHAL-1_2.0	-0.003904	0.001534	-0.004617	-0.003082	0.005438	0.000822
			CHAL-CHAL-30_0.90	0.438303	0.438245	-0.109782	0.328463	-5.8e-05	-0.10984
			CHAL-CHAL-30_0.95	0.387847	0.387485	-0.103382	0.284103	-0.000362	-0.103744
			CHAL-CHAL-30_1.0	0.330394	0.316897	-0.092435	0.224462	-0.013497	-0.105932
			CHAL-CHAL-30_1.05	0.273425	0.260913	-0.078267	0.182647	-0.012512	-0.090778
			CHAL-CHAL-30_1.10	0.201546	0.194667	-0.064682	0.129986	-0.006879	-0.07156
			CHAL-CHAL-30_1.25	0.090163	0.089705	-0.037501	0.052203	-0.000458	-0.03796
			CHAL-CHAL-30_1.50	0.026563	0.030609	-0.012827	0.017782	0.004046	-0.008781
			CHAL-CHAL-30_2.0	-0.001667	0.000506	-0.001921	-0.001415	0.002172	0.000252
			CHAL-CHAL-45_0.90	0.311593	0.301954	-0.049707	0.252248	-0.009639	-0.059345
			CHAL-CHAL-45_0.95	0.179172	0.172477	-0.047324	0.125152	-0.006695	-0.05402
			CHAL-CHAL-45_1.0	0.101104	0.096965	-0.043359	0.053606	-0.004139	-0.047498
			CHAL-CHAL-45_1.05	0.042185	0.039206	-0.040862	-0.001656	-0.002979	-0.043841
			CHAL-CHAL-45_1.10	0.010589	0.004486	-0.036725	-0.032239	-0.006103	-0.042828
			CHAL-CHAL-45_1.25	-0.018313	-0.014043	-0.023864	-0.037906	0.00427	-0.019593
			CHAL-CHAL-45_1.50	-0.05688	-0.045645	-0.012734	-0.058379	0.011235	-0.001499
			CHAL-CHAL-45_2.0	-0.014097	-0.007478	-0.002124	-0.009601	0.006619	0.004496
				localized
				Te	Se	S	all	Te	Se	S	all
				RMSD				MAD
			PNO-LMP2	0.082	0.268	0.135	0.18	0.046	0.219	0.092	0.119
			PNO-LCCSD	0.127	0.264	0.13	0.185	0.091	0.215	0.085	0.13
			(T)	0.11	0.073	0.036	0.079	0.097	0.063	0.032	0.064
			PNO-LCCSD(T)	0.067	0.191	0.105	0.132	0.052	0.153	0.071	0.092
			CCSD-MP2	0.063	0.007	0.007	0.037	0.055	0.005	0.006	0.022
			CCSD(T)-MP2	0.048	0.078	0.04	0.058	0.042	0.066	0.034	0.047

## Sheet: SOC2
							Table S8: Impact of Second-Order Spin-Orbit Coupling (SOC2) on the binding energies of 24 systems calculated at the CAM-B3LYP/aug-cc-pVQZ-DK Level. BE is the negative of the difference between the energy of the complex and the energy when the monomers are at a distance where SOC2 effects are negligible. Thus, positive BE values indicate dimer stabilization.
		Table S7: Impact of Second-Order Spin-Orbit Coupling (SOC2) on the binding energies of 24 systems calculated at the STEOM-CCSD/aug-cc-pVTZ-DK Level. BE is the negative of the difference between the energy of the complex and the energy when the monomers are at a distance where SOC2 effects are negligible. Thus, positive BE values indicate dimer stabilization.
							CAM-B3LYP/aug-cc-pVQZ-DK						Table S9: Impact of Second-Order Spin-Orbit Coupling (SOC2) on the binding energies calculated at the STEOM-CCSD/aug-cc-pVTZ-DK Level. BE is the negative of the difference between the energy of the complex and the energy when the monomers are at a distance where SOC2 effects are negligible. Thus, positive BE values indicate dimer stabilization.
		STEOM-CCSD/aug-cc-pVTZ-DK						SOC2 (kcal/mol)						SOC2 (kcal/mol)
			SOC2 (kcal/mol)										TeHF-NH3_0.80	-1.29152
													TeHF-NH3_0.85	-1.20688
							CHAL-CHAL-1_0.90	-1.49179					TeHF-NH3_0.90	-1.04546
		CHAL-CHAL-1_0.90	-0.489142				CHAL-CHAL-1_0.95	-1.51914					TeHF-NH3_0.95	-0.778971
		CHAL-CHAL-1_0.95	-0.518911				CHAL-CHAL-1_1.0	-1.53946					TeHF-NH3_1.0	-0.753695
		CHAL-CHAL-1_1.0	-0.383294				CHAL-CHAL-1_1.05	-1.55161					TeHF-NH3_1.05	-0.688101
		CHAL-CHAL-1_1.05	-0.389162				CHAL-CHAL-1_1.10	-1.5572					TeHF-NH3_1.10	-0.61932
		CHAL-CHAL-1_1.10	-0.349087				CHAL-CHAL-1_1.25	-1.24562					TeHF-NH3_1.25	-0.483615
		CHAL-CHAL-1_1.25	-0.152005				CHAL-CHAL-1_1.50	-0.279078					TeHF-NH3_1.50	-0.0569316
		CHAL-CHAL-1_1.50	0.0015515				CHAL-CHAL-1_2.0	-0.0667795					TeHF-NH3_2.0	-0.0112523
		CHAL-CHAL-1_2.0	0.0450967				CHAL-CHAL-1_4.0	-0.00152279					TeHF-NH3_4.0	REF
		CHAL-CHAL-1_4.0	REF				CHAL-CHAL-1_10.0	REF
													SeHF-NH3_0.80	-0.161346
		CHAL-CHAL-30_0.90	-0.0523494				HAL-CHAL-30_0.90	-0.115415					SeHF-NH3_0.85	-0.147611
		CHAL-CHAL-30_0.95	-0.0479466				CHAL-CHAL-30_0.95	-0.103118					SeHF-NH3_0.90	-0.14071
		CHAL-CHAL-30_1.0	-0.0350065				CHAL-CHAL-30_1.0	-0.0895853					SeHF-NH3_0.95	-0.0948059
		CHAL-CHAL-30_1.05	-0.0404814				CHAL-CHAL-30_1.05	-0.0761357					SeHF-NH3_1.0	-0.0850457
		CHAL-CHAL-30_1.10	-0.036408				CHAL-CHAL-30_1.10	-0.0643005					SeHF-NH3_1.05	-0.0765478
		CHAL-CHAL-30_1.25	-0.0240233				CHAL-CHAL-30_1.25	-0.0374573					SeHF-NH3_1.10	-0.067543
		CHAL-CHAL-30_1.50	-0.0102092				CHAL-CHAL-30_1.50	-0.0150559					SeHF-NH3_4.0	REF
		CHAL-CHAL-30_2.0	-0.0165897				CHAL-CHAL-30_2.0	-0.00332717
		CHAL-CHAL-30_4.0	REF				CHAL-CHAL-30_4.0	REF
							HAL-CHAL-45_0.80	-0.00086159
							CHAL-CHAL-45_0.85	-0.00074762
		CHAL-CHAL-45_0.90	0.00065105				CHAL-CHAL-45_0.90	-0.00063423
		CHAL-CHAL-45_0.95	0.00094714				CHAL-CHAL-45_0.95	-0.00050576
		CHAL-CHAL-45_1.0	0.00106894				CHAL-CHAL-45_1.0	-0.00048459
		CHAL-CHAL-45_1.05	0.00113013				CHAL-CHAL-45_1.05	-0.0004002
		CHAL-CHAL-45_1.10	0.0009396				CHAL-CHAL-45_1.10	-0.00067715
		CHAL-CHAL-45_1.25	0.00058783				CHAL-CHAL-45_1.25	-0.00048285
		CHAL-CHAL-45_1.50	7.018e-05				CHAL-CHAL-45_1.50	-0.00020387
		CHAL-CHAL-45_2.0	REF				CHAL-CHAL-45_2.0	REF
